# Supplementary material
Source: publisher figshare collection journal article supplement (https://tandf.figshare.com/ndownloader/files/12752210)
Supplement: Supplementary file 1 [file 12752210]

**How U.S. Research Institutions are Responding to the Single Institutional Review Board Mandate: Supplementary Material**

**Survey Questions**

1. What is your knowledge of the single IRB mandate, including knowledge of requirements, exceptions, and effective date?
   1. Excellent.
   2. Very Good.
   3. Good.
   4. Fair.
   5. Poor.
2. What is your opinion of the mandate for a single IRB for cooperative research found in the revised Common Rule and NIH policy?
   1. Strongly approve
   2. Approve
   3. Neither approve nor disapprove
   4. Disapprove
   5. Strongly disapprove
3. What are some of the benefits of the mandate? Check all that apply.
   1. Reduces redundant IRB review.
   2. Enhances quality or consistency of IRB review.
   3. Saves money or resources.
   4. Encourages cooperative research.
   5. Other (please describe)
4. What are some of potential problems with the mandate? Check all that apply.
   1. Problems with negotiating reliance agreements.
   2. Problems with implementing reliance agreements.
   3. Problem with legal liability.
   4. Problems with educating or training investigators, IRB members, or IRB support staff.
   5. Problems with developing policies or standard operating procedures.
   6. Problems with securing adequate resources to comply with the mandate.
   7. Problems with IRB review of the local research context.
   8. Other (please describe).
5. What steps, if any, is your institution taking to comply with the single IRB mandate? Check all that apply.
   1. Educating or training investigators, IRB members, or staff.
   2. Developing policies or standard operating procedures.
   3. Developing or acquiring reliance agreement templates.
   4. Negotiating reliance agreements with other institutions.
   5. Allocating resources to comply with the single IRB mandate.
   6. Other (please describe)
6. What level of difficulty do you expect your institution will have with complying with the single IRB mandate?
   1. No difficulty
   2. Minimal difficulty
   3. More than minimal not significant difficulty.
   4. Significant but not serious difficulty.
   5. Serious difficulty.
7. To the best of your knowledge, has your institution faced any problems with negotiating or implementing reliance agreements in the past five years?
8. If your answer is yes to question 6, please describe some of these problems.
9. To the best of your knowledge, has your institution ever decided not to engage in cooperative research in the past five years due to problems with reliance agreements?
10. Approximately how many new human research studies does your institution review each year (not including exempt research)?
    1. 1-50
    2. 51-100
    3. 101-150
    4. 151-200
    5. More than 200
11. What is your type of institution?
    1. University
    2. College
    3. Medical school or academic medical center
    4. Hospital or clinical center
    5. Other
12. Is your institution public or private?
13. If you have any other comments about the single IRB mandate, please enter them below.
